# Supplementary material for: Transcriptome Profiling and Metagenomic Analysis Help to Elucidate Interactions in an Inflammation-Associated Cancer Mouse Model
Source: MDPI journal article supplement (doi:10.3390/cancers13153683), 2021-07-22
Supplement: s1 [file s1]

Fig. S1

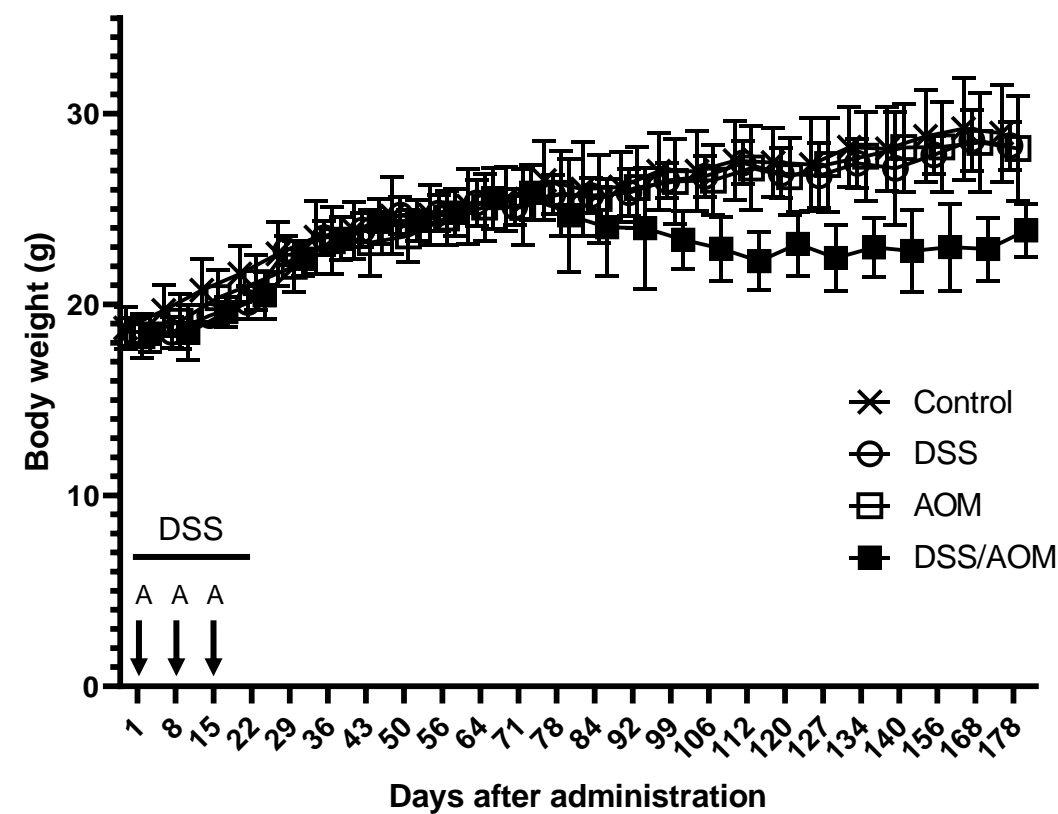

Figure S1. Body weight change among each group. The data were plotted until day 178 at the sacrifice. The lines represent mean  $\pm$  SD. A; AOM
